## **Genome wide association study based on clustering by obesity-related variables shed light on a genetic architecture of obesity in Japanese and UK population**

Ippei Takahashi<sup>1</sup>, Hisashi Ohseto<sup>1</sup>, Fumihiko Ueno<sup>1,2</sup>, Tomomi Onuma<sup>2</sup>,  
Akira Narita<sup>1,2</sup>, Taku Obara<sup>1,2,3</sup>, Mami Ishikuro<sup>1,2</sup>, Keiko Murakami<sup>1,2</sup>, Aoi Noda<sup>1,2,3</sup>,  
Atsushi Hozawa<sup>1,2</sup>, Junichi Sugawara<sup>1,2</sup>, Gen Tamiya<sup>1,2,4</sup>, Shinichi Kuriyama<sup>1,2,5\*</sup>

<sup>1</sup>Graduate School of Medicine, Tohoku University, Sendai, Japan.

<sup>2</sup>Tohoku Medical Megabank Organization, Tohoku University, Sendai, Japan.

<sup>3</sup>Tohoku University Hospital, Sendai, Japan.

<sup>4</sup>RIKEN Center for Advanced Intelligence Project, Tokyo, Japan.

<sup>5</sup>International Research Institute of Disaster Science, Tohoku University, Sendai, Japan.

### **Financial Support**

The Tohoku Medical Megabank Project Birth and Three-Generation Cohort Study and the Community-Based Cohort Study were supported by the Japan Agency for Medical Research and Development (AMED) (grant numbers JP20km0105001 and JP21km0105002). This study was also supported by the Ministry of Education, Culture, Sports, Science, and Technology (MEXT) KAKENHI (grant numbers 19H03894 and 22H03346). AMED and MEXT had no role in the design or execution of the study.

### **Conflict of Interest and Funding Disclosure**

No conflicts of interest

### **Corresponding Author**

Shinichi Kuriyama

Mailing address: Tohoku Medical Megabank Organization, 2-1 Seiryomachi, Aoba-ku,  
Sendai, 980-8573, Japan.

E-mail address: kuriyama@med.tohoku.ac.jp

Telephone: +81 22-717-8104

**Running title:** Genetic architecture of Obesity

### **Abbreviations**

AS: antisense RNA; BDNF: brain-derived neurotrophic factor; BirThree Cohort Study: Birth and Three-Generation Cohort Study, CommCohort Study; BMI: body mass index; cGWAS: cluster-based GWAS; FFQ: food frequency questionnaire; GRM: genetic relationship matrix; GWAS: genome-wide association study; HWE: Hardy-Weinberg equilibrium; KNN: k-nearest neighbors; MAF: minor allele frequency; MC4R: melanocortin-4-receptors; PCA: principal component analysis; SD: standard deviation; TMM: Tohoku Medical Megabank Project, Community-Based Cohort Study

1 **Abstract**

2 **Background:** Many loci associated with obesity have been reported in previous genome-  
3 wide association studies (GWASs). However, it remains unclear whether variants at all these  
4 loci contributed to onset of obesity or whether one or a few variants cause obesity when  
5 obesity is a genetically heterogeneous population.

6 **Objective:** To investigate the genetic architecture of obesity by clustering a population with  
7 obesity into clusters using obesity-related factors.

8 **Methods:** This study was based on the Tohoku Medical Megabank Project Birth and Three-  
9 Generation Cohort Study and the Community-Based Cohort Study. As the Step-1, a GWAS  
10 with body mass index (BMI) as an outcome was performed for all 48,365 eligible participants.  
11 As the Step-2, we then assigned the 13,067/48,365 participants with obesity ( $BMI \geq 25$   
12  $kg/m^2$ ) using the k-prototype to 5 clusters. Obesity-related factors (such as age, nutrient  
13 intake, physical activity, sleep duration, difference between weight at age 20 and current  
14 weight, smoking, alcohol drinking, psychological distress, and birth weight) were used for  
15 clustering. Subsequently, participants in each cluster and those with a  $BMI < 25 kg/m^2$  were  
16 combined, and GWASs were performed according to the 5 clusters. Additionally, a sub-  
17 analysis using data from the UK Biobank was conducted to compare the results.

18 **Results:** The Step-1 detected 18 genes, most of which were reportedly associated with  
19 obesity or obesity-related topics in previous studies. The result of Step-2, of the 18 genes  
20 detected in Step-1, *LINC01741*, *CRYZL2P-SEC16B*, and *SEC16B* were significantly related  
21 to Cluster 2, *FTO*, *PMAIP1*, and *MC4R* to Cluster 3, and *BDNF*, *BDNF-AS*, *LINC00678*, and  
22 *KIF18A* to Clusters 4 and 5. In the sub-analysis, a similar phenomenon was observed in  
23 which separate obesity-related genes were detected for each cluster.

24 **Conclusions:** Our data support the notion that a decreased sample size with increased  
25 homogeneity may reveal insights into the genetic architecture of obesity.

26 **Keywords: GWAS, obesity, BMI, cGWAS, cluster analysis**

27

## 28 **Introduction**

29 Obesity is a serious global medical and economic issue that represents a major risk factor for  
30 many lifestyle-related diseases, such as diabetes, hyperlipidemia, and hypertension (1,2). The  
31 global proportion of individuals with a body-mass index (BMI)  $\geq 25$  kg/m<sup>2</sup> is reportedly  
32 36.9% for men and 38.0% for women (3). The pathogenesis of obesity is complex and  
33 includes regulation of calorie utilization, appetite, and physical activity, as well as health care  
34 availability, socioeconomic status, and underlying genetic and environmental factors (4,5).

35         The heritability of BMI has been widely reported. For instance, in twin studies, the  
36 BMI heritability ranged from 30% to 90% (6–8), whereas in genome-wide association studies  
37 (GWASs) it was estimated to be 20–30% (9–11), and only ~3% has been elucidated based on  
38 genome wide significant loci (9,10). Although GWASs using BMI as an outcome have  
39 identified over 100 associated loci (9–14), it remains unclear whether they all contribute to  
40 the development of obesity via the same pathway. Indeed, the association of these genetic  
41 variants with obesity may be explained by a polygenic model in which the effects of each  
42 variant are weak yet contribute to the onset of obesity (15). Hence, if the genetic architecture  
43 of obesity can be explained by a polygenic model, we would expect that larger sample sizes  
44 correspond to more identified signals, whereas as fewer signals would be associated with  
45 smaller sample sizes (Supplementary Figure 1). Meanwhile, within a genetically  
46 heterogeneous population of obesity, if few variants exhibit a relatively strong influence  
47 leading to obesity in a portion of the subtypes included therein, then dividing the population  
48 with obesity into homogeneous groups could detect unique genes in each population, even  
49 with a reduced sample size. However, to our knowledge, no GWASs have been conducted by  
50 dividing persons with obesity into more homogeneous populations.

51 Traylor et al. demonstrated that attempts to categorize patients with a complex  
52 disease into more homogeneous subgroups provided more power to elucidate hidden  
53 heritability in a simulation study (16). Thus, clustering algorithms for machine learning could  
54 reveal novel and more genetically homogeneous clusters. Accordingly, the purpose of this  
55 study was to investigate the genetic architecture of obesity by dividing individuals with  
56 obesity into clusters using various obesity-related factors and machine learning techniques  
57 and performing GWAS on each cluster (cluster-based GWAS: cGWAS) (17,18).

58

## 59 **Methods**

### 60 **Population**

61 This study was conducted according to the guidelines of the Declaration of Helsinki (19), and  
62 the protocol was reviewed and approved by the Institutional Review Board of the Tohoku  
63 Medical Megabank Organization. In the main study, we used data from cohort studies  
64 conducted by the Tohoku Medical Megabank Project (TMM) Birth and Three- Generation  
65 Cohort Study (BirThree Cohort Study) and the TMM Community-Based Cohort Study  
66 (CommCohort Study) (20-22). The BirThree Cohort Study and CommCohort Study were  
67 conducted in Miyagi and Iwate Prefectures, Japan. Details of the BirThree Cohort Study and  
68 the CommCohort Study have been described elsewhere (21,22). In brief, the BirThree Cohort  
69 Study is a birth and three-generation cohort study. Pregnant women were registered between  
70 July 2013 and March 2017 (21). Additionally, pregnant women's partners (fetus' father),  
71 pregnant women's parents and partner's parents (fetus' grandparents), as well as the fetus'  
72 siblings and their relatives, were recruited (21). Among the BirThree Cohort Study  
73 participants, fetus' mothers (n = 22,493), fetus' father (n = 8,823), and fetus' grandparents (n  
74 = 8,058) were included in this study. The TMM CommCohort study is a community-based  
75 prospective cohort study including men and women aged >20 years living in the Miyagi

76 Prefecture, northeastern Japan (22). The type 1 survey ( $n = 41,097$ ) which performed in  
77 specific municipal health check-up sites, Type 2 survey ( $n = 13,855$ ) which performed in  
78 assessment centers. (22).

79 Participants' data were excluded based on the following criteria: withdrew consent,  
80 failed to return the self-reported questionnaire,  $BMI < 18.5 \text{ kg/m}^2$ , missing information on the  
81 food frequency questionnaire (FFQ), extreme energy intake (energy intake  $> \text{mean} \pm 3$   
82 standard deviation [SD]), and duplicate participation in the both BirThree Cohort Study and  
83 CommCohort Study Type-1 (the data of earlier date of participation were included). Data  
84 from eligible participants of the BirThree Cohort Study ( $n = 23,479$ ), CommCohort Study  
85 Type-1 ( $n = 34,187$ ), and CommCohort Study Type-2 ( $n = 12,485$ ) were combined ( $n =$   
86  $70,151$ ). In the sub-analysis, a similar analysis was performed using the UK Biobank (UKB)  
87 data (23-25) to compare the results with those of the main study. Methods for analyzing the  
88 UKB data are described in the supplementary information.

89

### 90 **Genotyping, imputation, and quality control**

91 Cohort participants were genotyped using the Affymetrix Axiom Japonica Array (v2) in 19  
92 batches, with 50 plates set for each batch. Details pertaining to the genotyping performed in  
93 TMM have been described previously (26). Following batch genotyping, samples with a call  
94 rate  $< 0.95$  or samples with unusually high IBD values compared to other samples, were  
95 excluded. In addition, variants with Hardy-Weinberg equilibrium (HWE)  $P$ -values  $< 1.00 \times$   
96  $10^{-5}$ , minor allele frequency (MAF)  $< 0.01$ , or missing fraction  $> 0.01$  were excluded from  
97 each batch. A direct genotype dataset in PLINK BED format was obtained by merging the  
98 genotype datasets for the 19 batches. A total of 21,541 participants with missing direct  
99 genotype data were excluded. Principal component analysis (PCA) was performed using the -  
100 -pca approx option in PLINK 2.0 (27) on the direct genotype dataset and an additional 245

101 participants with > 4 SD for principal components 1 or 2 were excluded. Finally, a total of  
102 48,365 participants (BirThree Cohort Study:  $n = 11,674$ , CommCohort Study Type-1:  $n =$   
103 27,745, CommCohort Study Type-2:  $n = 8,946$ ) were included in the analysis (Figure 1).  
104 Plot of participants ( $n = 48,365$ ) according to principal component 1 and 2 by principal  
105 component analysis was shown Supplementary Figure 2.

106 To prepare an imputed genotype dataset, pre-phasing was performed using  
107 SHAPEIT2 (28), along with the `--duohmm` option (29), which incorporates information on  
108 the relatedness between individuals to increase phasing accuracy. The phased genotypes were  
109 subsequently imputed with a cross-imputed panel of 3.5KJPNv2 (30) and 1KGP3 (31) using  
110 IMPUTE4 (25). To create the cross-imputation panel for 3.5KJPNv2 (30) and 1KGP3 (31),  
111 the `-merge_ref_panels` option in IMPUTE2 was applied (32). Consequently, we obtained an  
112 imputed genotype dataset in the Oxford BGEN format  
113 (<https://www.well.ox.ac.uk/gav/qctool/>). For genotype imputation data, those with minor  
114 allele frequencies < 0.01 and imputation information scores < 0.8 were excluded. Finally,  
115 9,868,333 SNPs were included in the GWASs.

116

## 117 **Variables**

118 The following variables related to obesity were collected from questionnaires responded by  
119 the participants at baseline for each cohort and used for clustering: age, nutrient intake  
120 calculated from the FFQ based on frequency of food intake over the past year (energy,  
121 protein, fat, carbohydrate, sodium, potassium, calcium, magnesium, phosphorus, iron, zinc,  
122 copper, manganese, retinol equivalents, vitamin D, vitamin K, vitamin B1, vitamin B2, niacin,  
123 vitamin B6, vitamin B12, folate, pantothenic acid, vitamin C, cholesterol, dietary fiber,  
124 lycopene,  $\alpha$ -carotene,  $\beta$ -carotene, and  $\beta$ -cryptoxanthin), frequency of leisure time physical  
125 activity (slow walking, fast walking, moderate exercise, strenuous exercise; the choices

126 included: no activity, < once per month, 1–3 times per month, 1–2 times per week, 3–4 times  
127 per week, almost every day), time typically spent in physical activity per day (strenuous work,  
128 walk, standing, sitting) according to predetermined options (no time,  $\text{min} < 30$ ,  $30 \leq \text{min} < 60$ ,  
129  $1 \leq h < 3$ ,  $3 \leq h < 5$ ,  $5 \leq h < 7$ ,  $7 \leq h < 9$ ,  $9 \leq h < 11$ ,  $h \geq 11$ ), sleep duration ( $< 5$  h,  $5 \leq h < 6$ ,  $6$   
130  $\leq h < 7$ ,  $7 \leq h < 8$ ,  $8 \leq h < 9$ ,  $h \geq 9$ ), difference between weight at age 20 and current weight,  
131 smoking (smoked > 100 cigarettes since birth; yes or no), alcohol consumption (> 1 drink per  
132 month, quit, rarely, unable to drink), psychological distress over the past month (total K6  
133 score [Japanese version]) (33,34), and birth weight (unknown,  $1500 \leq g < 2000$ ,  $2000 \leq g <$   
134  $2500$ ,  $2500 \leq g < 3000$ ,  $3000 \leq g < 3500$ ,  $3500 \leq g < 4000$ ,  $g \geq 4000$ ). In addition, cohort type  
135 (BirThree Cohort Study, CommCohort study Type-1 and CommCohort study Type-2) was  
136 added to the variables for the clustering.

137           The missing variables used for clustering were imputed using the k-nearest neighbor  
138 (KNN) algorithm (35). KNN selects k samples close to the missing values in the feature  
139 space and imputes the median of the k samples in the case of continuous variables, or the  
140 most frequent category among the k samples in the case of categorical variables. KNN was  
141 implemented using the R package VIM (36). Based on previous reports (35,37), we set k to  
142 219 as an odd number close to the square root of 48,365 participants.

143

#### 144 **Body mass index**

145 BMI was computed by dividing weight (kg) by the squared height ( $\text{m}^2$ ) using self-reported  
146 height and weight on a questionnaire responded by the participants at baseline for each cohort.  
147 A BMI  $> 25 \text{ kg/m}^2$  was defined as obese based on the Western Pacific Region of the World  
148 Health Organization criteria for Asians (38).

149

#### 150 **Cluster analysis**



151 The k-prototype is a clustering algorithm that combines k-means and k-modes and enables  
152 clustering using continuous and categorical variables (39). The k-prototype was implemented  
153 using the R package clustMixType (40). The number of clusters was set to 5. Continuous  
154 variables were standardized by subtracting the mean of each variable and dividing it by the  
155 SD before clustering.

156

### 157 **Genome-wide association study**

158 The GWASs with BMI as a continuous variable were conducted in 2 steps. Step-1: GWAS  
159 was performed on all 48,365 participants. Step-2: 13,067 of the 48,365 participants were  
160 clustered using the k-prototype to 5 clusters. Thereafter, participants in each of the 5 obesity  
161 clusters and those with a BMI < 25 kg/m<sup>2</sup> were combined, and the GWASs were performed  
162 for each of the 5 clusters (Supplementary Figure 3). To identify associations between  
163 autosomal SNPs and BMI, fastGWA with the GCTA software were employed (41).  
164 FastGWA is a linear mixed model using a sparse genetic relationship matrix (GRM) that is  
165 reportedly robust for population stratification and familial relationships (42). The top 20  
166 principal components calculated from the PCA of the direct genotyping dataset, sex, age, and  
167 cohort type (BirThree Cohort Study, CommCohort study type-1 and CommCohort study  
168 type-2) were included as covariates. We set the Bonferroni genome-wide significance line at  
169  $P < 8.33 \times 10^{-9}$  ( $5.0 \times 10^{-8}/6$ ) as six GWASs were performed for Step-1 and Step-2. The  
170 detected SNPs were annotated using the ANNOVAR (43). Manhattan plots and quantile-  
171 quantile plots (Q-Q plots) were generated using R (version 4.1.0).

172

## 173 **Results**

### 174 **Clustering**

175 Following assignment of the 13,067 participants with obesity into 5 clusters, Cluster 1  
176 contained 628 participants, Cluster 2 had 3,073, Cluster 3 had 4,111, Cluster 4 had 2,468, and  
177 Cluster 5 contained 2,787. Table 1 shows the characteristics of obese participants (BMI  $\geq$  25  
178 kg/m<sup>2</sup>) in each cluster. The variables were characterized by mean and SD for continuous  
179 variables and by number and percentage for categorical variables. The participants in Cluster  
180 1 had the highest energy and nutrient intakes, as well as a higher frequency of leisure-time  
181 exercise. Cluster 2 was characterized by a higher proportion of women, older age, and the  
182 highest percentage of nonsmokers. Cluster 3 participants had the lowest energy and nutrient  
183 intake and a high proportion who did not exercise during leisure time nor perform their usual  
184 physical activities (strenuous work, walking, and standing). Cluster 4 had the second-highest  
185 energy and nutrient intake. Cluster 5 was characterized by the largest proportion of men,  
186 lowest age, longest time spent standing or sitting, highest number of smokers, highest  
187 proportion of alcohol drinkers, and highest scores for psychological distress.

188

### 189 **Gene interpretation**

190 We observed several genes that satisfied the  $P < 8.33 \times 10^{-9}$  threshold in Step-1 (Figure 2 and  
191 Supplementary Table 1). Most genes for which associations were detected in Step-1 are  
192 reportedly associated with obesity. More specifically, *LINC01741* (44–46) (Chr 1),  
193 *CRYZL2P-SEC16B* (45,47) (Chr 1), *SEC16B* (46,47) (Chr 1), *TMEM18* (48,49) (Chr 2),  
194 *BDNF* (45,47) (Chr 11), *LINC00678* (50,51) (Chr 11), *BDNF-AS* (45,47) (Chr 11), *FTO*  
195 (9,10,45,52) (Chr 16), *MC4R* (53,54) (Chr 18), *GIPR* (13) (Chr 19), and *FBXO46* (50) (Chr  
196 19) were previously associated with BMI. Meanwhile, *KIF18A* (Chr 11) was previously  
197 associated with visceral fat (55), *PMAIP1* (Chr 18) with serum IgE measurement (56) and  
198 monocyte count (57,58), *RSPH6A* (Chr 19) with high and low density lipoprotein cholesterol

199 levels (59), *SYMPK* (Chr 19) with Type 2 diabetes mellitus (60) and total cholesterol levels  
200 (50), and *FOXA3* (Chr 19) with waist-to-hip ratio adjusted for BMI (52).

201 From the GWAS results in Step-2, several variants detected in Step-1 were observed  
202 in separate clusters (Figure 3, Supplementary Table 2). Genome-wide associations were not  
203 detected in Cluster 1. In Cluster 2, the loci that satisfied this threshold were identified as  
204 *LINC01741*, *CRYZL2P-SEC16B* (Chr 1; intergenic), *CRYZL2P-SEC16B*, and *SEC16B* (Chr  
205 1). Meanwhile, in Cluster 3, the *FTO* (chromosome 16), *PMAIP1*, and *MC4R* (chromosome  
206 18; intergenic) loci were identified. For Cluster 4, *BDNF* (Chr 11), *BDNF-AS* (Chr 11),  
207 *BDNF-AS*, *LINC00678* (Chr 11), and *BDNF*, *KIF18A* (Chr 11) loci were identified.  
208 Additionally, in Cluster 5, *BDNF-AS*, *LINC00678* (Chr 11), *LINC00678* (Chr 11), *BDNF-AS*  
209 (Chr 11), *BDNF* (Chr 11), and *BDNF*, *KIF18A* (Chr 11) loci were identified (Figure 3).  
210 Quantile-quantile plots corresponding to the GWAS results of the main study are shown in  
211 Supplementary Figure 4.

212 In the sub-analysis, the UKB data was applied for comparison with the main study  
213 results. In Step-1, we confirmed the association between representative obesity-related genes  
214 and BMI (Supplementary Table 3 and Supplementary Figure 5). In Step-2, the clustering  
215 results for the 32,779 obese participants revealed that Clusters 1–5 comprised  
216 5,874, 6,497, 6,919, 6,733, and 6,756 participants, respectively. The characteristics of each  
217 cluster are shown in Supplementary Table 4. In the GWAS results for Step-2, several variants  
218 detected in Step-1 were found in separate clusters, similar to the TMM cohort analysis  
219 (Supplementary Table 5 and Supplementary Figure 6).

220

## 221 **Discussion**

222 Herein, we conducted a GWAS of all participants for BMI in Step-1. In Step-2, obese  
223 participants ( $\text{BMI} \geq 25 \text{ kg/m}^2$ ) were divided into 5 clusters based on obesity-related-factors,

224 and GWAS was performed for each of the 5 clusters. Consequently, several genes identified  
225 in previous studies were confirmed in Step-1. Of the 18 genes detected in Step-1, *LINC01741*,  
226 *CRYZL2P-SEC16B*, and *SEC16B* were significantly associated with Cluster 2, *FTO*, *PMAIP1*,  
227 and *MC4R* to Cluster 3, and *BDNF*, *BDNF-AS*, *BDNF-AS*, *LINC00678*, and *KIF18A* to  
228 Clusters 4 and 5. A similar phenomenon was observed in the sub-analysis using UKB data, in  
229 which unique obesity-related genes were detected in each cluster.

230 It is important to consider how the cluster characteristics relate to the variants  
231 identified in each cluster. Indeed, the GWAS results in Step-2 may be partially explained by  
232 cluster characteristics. In cluster 1, significant associations were not detected, which might be  
233 due to the low number of participants with a BMI > 25.0 kg/m<sup>2</sup> as this cluster contained the  
234 fewest obese participants. Hence, the detection power would have been insufficient.

235 *FTO*, *PMAIP1*, and *MC4R* (intergenic) variants were associated with BMI in Cluster  
236 3. Variants in the *FTO* region regulate *IRX3* and *IRX5* expression (61), which promotes fat  
237 accumulation and cause obesity. Meanwhile, melanocortin-4-receptors (MC4R) transcribed  
238 by the *MR4C* gene regulate food intake and energy expenditure (62,63). Moreover, *MC4R* in  
239 the paraventricular hypothalamus or amygdala controls food intake, while its expression  
240 elsewhere is responsible for energy expenditure (62). Therefore, the genetic variants in *FTO*  
241 and *MC4R*, which have been attributed to increased body fat accumulation and reduced  
242 energy expenditure, may partially account for the obesity of individuals in Cluster 3 despite a  
243 low energy intake.

244 In Cluster 4 and Cluster 5, *BDNF* and *BDNF-AS* variants were identified. Obese  
245 participants in Cluster 4 had the second highest energy and nutrient intake, while those in  
246 Cluster 5 had the highest mean score for psychological distress (K6 total score). Brain  
247 derived neurotrophic factor (BDNF), which is transcribed by the *BDNF* gene, promotes the  
248 development and growth of nerve cells and reportedly has anti-obesity effects (64,65).

249 Furthermore, transcription of the *BDNF-AS* (antisense RNA) gene is responsible for  
250 regulating *BDNF* expression (66). Thus, altering BDNF regulation might affect the central  
251 nervous system and alter eating behaviors and psychiatric conditions, as seen in this cluster.

252 In Cluster 2, *SEC16B* variants were detected; the obese participants in this cluster  
253 had the highest proportion of women, increased age, and nonsmokers. Variants of *SEC16B*  
254 may be associated with obesity via regulation of dietary lipid absorption and appetite (67,68).  
255 However, to our knowledge, no previous data has made direct connections between the  
256 characteristics of Cluster 2 participants and *SEC16B* variants. On the other hand, it should be  
257 noted that the characteristics of clusters are not always recognizable to humans. That is, given  
258 that clustering algorithms extract latent features by combining numerous variables, the  
259 resulting clusters, although more homogeneous, are not necessarily comprehensible. Thus, it  
260 will be necessary to define these obscure clusters identified by clustering algorithms.

261 This study has several strengths. First, the GWAS results had high validity. That is,  
262 most genes detected in this study were previously reported to be associated with BMI.  
263 Therefore, the GWAS data was considered appropriate. Second, the TMM and UKB cohorts  
264 had various obesity-related factors. Using these 2 cohorts, it was possible to cluster the obese  
265 population into more homogeneous groups using a rich set of obesity-related factors. Third,  
266 the sub-analysis replicated the phenomenon, in which unique obesity-related genes were  
267 detected in each cluster. This supports the hypothesis that obesity is an aggregation of  
268 heterogeneous subgroups. The findings of this study suggest possibility that by dividing  
269 obesity into homogeneous populations, fewer genetic variants could explain obesity in each  
270 subgroup. Although many issues remain to be addressed to elucidate the full genetic  
271 architecture of obesity, the current study provides important insights with the potential to  
272 inform the development of personalized treatment or nutritional support for obesity. More  
273 specifically, once clusters are identified, a classifier can be created using the cluster numbers

274 as training data, which can then be applied to classify obesity into subgroups and verify the  
275 effectiveness of obesity treatment according to the subgroups.

276

## 277 **Limitations**

278 This study has certain limitations. First, it is unclear whether the selection of  
279 variables, algorithm, or number of clusters was optimal. In this study, many factors related to  
280 obesity were selected, however, the existence of unknown obesity-related factors cannot be  
281 ruled out. In addition, the number of clusters in this study was arbitrarily set to 5. Therefore,  
282 it is needed to explore them in the future. Second, obesity was assessed at a temporal point;  
283 therefore, the possibility of misclassification may have occurred. Even those who were not  
284 obese at the time of measurement had the potential to become obese with age. Third, the BMI  
285 was calculated using height and weight from self-reported questionnaires in the main study.  
286 Previous studies have shown no substantial differences between BMI calculated from self-  
287 reported height and weight and that calculated from measured height and weight, indicating  
288 that self-reported weight and height are useful (69). Therefore, it is unlikely that the use of  
289 self-reported height and weight data significantly distorted the results. Fourth, we could not  
290 assess the heritability of each cluster due to the small sample size.

291

## 292 **Conclusion**

293 Our data suggest that a decreased sample size with increased homogeneity may reveal  
294 insights into the genetic architecture of obesity.

295

## 296 **Acknowledgments**

297 The authors thank the participants of the Tohoku Medical Megabank Project Birth and Three-  
298 Generation Cohort Study, Community-Based Cohort Study, and UK Biobank. The authors

299 also thank the staff members of the Tohoku Medical Megabank Organization  
300 (<https://www.megabank.tohoku.ac.jp/english/a210901/>) and UK Biobank.

301

### 302 **Author Contributions**

303 IT, HO, FU, TO, and SK designed research; IT conducted research; IT analyzed data; and IT  
304 HO, and SK wrote the paper. SK had primary responsibility for final content. All authors read  
305 and approved the final manuscript.

306

### 307 **Data Sharing**

308 For the TMM biobank, data are available from the authors upon reasonable request and with  
309 the permission of the TMM biobank. All inquiries about access to the data should be sent to  
310 the TMM biobank ([dist@megabank.tohoku.ac.jp](mailto:dist@megabank.tohoku.ac.jp)). For the UKB, the data will be available to  
311 the public by requesting it from UK Biobank.

## References

1. Haslam DW, James WPT. Obesity. *Lancet*. 2005;366:1197–209. doi:10.1016/S0140-6736(05)67483-1
2. Eckel RH, Grundy SM, Zimmet PZ. The metabolic syndrome. *Lancet*. 2005;365:1415–28. doi:10.1016/S0140-6736(05)66378-7
3. Ng, M, Fleming T, Robinson M, Thomson B, Graetz N, Margono EC, *et al*. Global, regional, and national prevalence of overweight and obesity in children and adults during 1980-2013: a systematic analysis for the Global Burden of Disease Study 2013. *Lancet*. 2014;384:766–81. doi:10.1016/S0140-6736(14)60460-8
4. Lin X, Li H. Obesity: Epidemiology, pathophysiology, and therapeutics. *Front Endocrinol (Lausanne)*. 2021;12:706978. doi:10.3389/fendo.2021.706978
5. Lyon HN, Hirschhorn JN. Genetics of common forms of obesity: a brief overview. *Am J Clin Nutr*. 2015;82:215S–7S. doi:10.1093/ajcn/82.1.215S
6. Feng R. How much do we know about the heritability of BMI?. *Am J Clin Nutr*. 2016;104:243–4. doi:10.3945/ajcn.116.139451
7. Elks CE, den Hoed M, Zhao JH, Sharp SJ, Wareham NJ, Loos RJF, *et al*. Variability in the heritability of body mass index: a systematic review and meta-regression. *Front Endocrinol (Lausanne)*. 2012;3:29. doi:10.3389/fendo.2012.00029
8. Min J, Chiu DT, Wang Y. Variation in the heritability of body mass index based on diverse twin studies: a systematic review. *Obes Rev* 2013;14:871–82. doi:10.1111/obr.12065
9. Akiyama M, Okada Y, Kanai M, Takahashi A, Momozawa Y, Ikeda M, *et al*. Genome-wide association study identifies 112 new loci for body mass index in the Japanese population. *Nat Genet*. 2017;49:1458–6. doi:10.1038/ng.3951



10. Locke AE, Kahali B, Berndt SI, Justice AE, Pers TH, Day FR, *et al.* Genetic studies of body mass index yield new insights for obesity biology. *Nature* 2015;518:197–206. doi:10.1038/nature14177.
11. Yang J, Bakshi A, Zhu Z, Hemani G, Vinkhuyzen AE, Lee SH, *et al.* Genetic variance estimation with imputed variants finds negligible missing heritability for human height and body mass index. *Nat Genet.* 2015;47:1114–20. doi:10.1038/ng.3390
12. Speliotes EK, Willer CJ, Berndt SI, Monda KL, Thorleifsson G, Jackson AU, *et al.* Association analyses of 249,796 individuals reveal 18 new loci associated with body mass index. *Nat Genet.* 2010;42:937–48. doi:10.1038/ng.686
13. Wen W, Zheng W, Okada Y, Takeuchi F, Tabara Y, Hwang J-Y, *et al.* Meta-analysis of genome-wide association studies in East Asian ancestry populations identifies four new loci for body mass index. *Hum Mol Genet.* 2014;23:5492–504. doi:10.1093/hmg/ddu248
14. Scuteri A, Sanna S, Chen W-M, Uda M, Albai G, Strait J, *et al.* Genome-wide association scan shows genetic variants in the FTO gene are associated with obesity-related traits. *PLoS Genet.* 2007;3:e115. doi:10.1371/journal.pgen.0030115.
15. Khera AV, Chaffin M, Wade KH, Zahid S, Brancale J, *et al.* Polygenic prediction of weight and obesity trajectories from birth to adulthood. *Cell.* 2019;177:587–96. doi:10.1016/j.cell.2019.03.028
16. Traylor M, Markus H, Lewis CM. Homogeneous case subgroups increase power in genetic association studies. *Eur J Hum Genet.* 2015;23:863. doi:10.1038/ejhg.2014.194
17. Ueno F, Onuma T, Takahashi I, Ohseto H, Narita A, Obara T, *et al.* Deep embedded clustering by relevant scales and genome-wide association study in autism. *bioRxiv.* 2022. doi:10.1101/2022.07.25.500917.

18. Narita A, Nagai M, Mizuno S, Ogishima S, Tamiya G, Ueki M, *et al.* Clustering by phenotype and genome-wide association study in autism. *Transl Psychiatry*. 2020;10:290. doi:10.1038/s41398-020-00951-x
19. World Medical Association. World Medical Association Declaration of Helsinki: ethical principles for medical research involving human subjects. *JAMA* 2013;310:2191–4. doi:10.1001/jama.2013.281053.
20. Kuriyama S, Yaegashi N, Nagami F, Arai T, Kawaguchi Y, Osumi N, *et al.* The Tohoku Medical Megabank Project: Design and mission. *J Epidemiol*. 2016;26:493–511. doi:10.2188/jea.JE20150268
21. Kuriyama S, Metoki H, Kikuya M, Obara T, Ishikuro M, Yamanaka C, *et al.* Cohort Profile: Tohoku Medical Megabank Project Birth and Three-Generation Cohort Study (TMM BirThree Cohort Study): rationale, progress and perspective. *Int J Epidemiol*. 2020;49:18–9. doi:10.1093/ije/dyz169
22. Hozawa A, Tanno K, Nakaya N, Nakamura T, Tsuchiya N, Hirata T, *et al.* Study Profile of the Tohoku Medical Megabank Community Based Cohort Study. *J Epidemiol*. 2021;31:JE20190271. doi:10.2188/jea.JE20190271
23. Sudlow C, Gallacher J, Allen N, Beral V, Burton P, Danesh J, *et al.* UK Biobank: an open access resource for identifying the causes of a wide range of complex diseases of middle and old age. *PLoS Med*. 2015;12:e1001779. doi:10.1371/journal.pmed.1001779
24. Bycroft C, Freeman C, Petkova D, Band G, Elliott LT, Sharp K, *et al.* Genome-wide genetic data on ~500,000 UK Biobank participants. *bioRxiv*. 2017. doi:10.1101/166298.
25. Bycroft C, Freeman C, Petkova D, Band G, Elliott LT, Sharp K, *et al.* The UK Biobank resource with deep phenotyping and genomic data. *Nature* 2018;562:203–9. doi:10.1038/s41586-018-0579-z

26. Yamada M, Motoike IN, Kojima K, Fuse N, Hozawa A, Kuriyama S, et al. Genetic loci for lung function in Japanese adults with adjustment for exhaled nitric oxide levels as airway inflammation indicator. *Commun Biol.* 2021;15:1288. doi:10.1038/s42003-021-02813-8
27. Chang CC, Chow CC, Tellier LC, Vattikuti S, Purcell SM, Lee JJ. Second-generation PLINK: Rising to the challenge of larger and richer datasets. *Gigascience.* 2015;4:7. doi:10.1186/s13742-015-0047-8
28. Delaneau O, Zagury JF, Marchini J. Improved whole-chromosome phasing for disease and population genetic studies. *Nat Methods.* 2013;10:5–6. doi:10.1038/nmeth.2307.
29. O'Connell J, Gurdasani D, Delaneau O, Pirastu N, Ulivi S, Cocca M, et al. A general approach for haplotype phasing across the full spectrum of relatedness. *PLoS Genet.* 2014;10:e1004234. doi:10.1371/journal.pgen.1004234.
30. Tadaka S, Katsuoka F, Ueki M, Kojima K, Makino S, Saito S, et al. 3.5KJPNv2: an allele frequency panel of 3552 Japanese individuals including the X chromosome. *Hum Genome Var.* 2019;6:28. doi:10.1038/s41439-019-0059-5
31. The 1000 Genomes Project Consortium. A global reference for human genetic variation. *Nature.* 2015;526:68–74. doi:10.1038/nature15393
32. Howie BN, Donnelly P, Marchini J. A flexible and accurate genotype imputation method for the next generation of genome-wide association studies. *PLoS Genet.* 2009;5:e1000529. doi:10.1371/journal.pgen.1000529
33. Kessler RC, Andrews G, Colpe LJ, Hiripi E, Mroczek DK, Normand SLT, et al. Short screening scales to monitor population prevalences and trends in non-specific psychological distress. *Psychol Med.* 2002;32:959–76. doi:10.1017/s0033291702006074

34. Furukawa TA, Kawakami N, Saitoh M, Ono Y, Nakane Y, Nakamura Y, *et al.* The performance of the Japanese version of the K6 and K10 in the World Mental Health Survey Japan. *Int J Methods Psychiatr Res.* 2008;17:152–8. doi:10.1002/mpr.257
35. Zhang, Z. Introduction to machine learning: k-nearest neighbors. *Ann Transl Med.* 2016;4:2188. doi:10.21037/atm.2016.03.37.
36. Templ M, Kowarik A, Alfons A, de Cillia G, Prantner B, Rannetbauer W. Visualization and imputation of missing values. 2022. Available from: <https://cran.r-project.org/web/packages/VIM/VIM.pdf>
37. Lantz B. Machine learning with R: Expert techniques for predictive modeling to solve all your data analysis problems. 2nd ed. Birmingham-Mumbai: Packt Publishing, 2015.
38. World Health Organization. Regional Office for the Western Pacific. The Asia-Pacific perspective: redefining obesity and its treatment. Sydney: Health Communications Australia, 2000. Available from: <https://apps.who.int/iris/handle/10665/206936>
39. Huang Z. Extensions to the k-Means Algorithm for Clustering Large Data Sets with Categorical Values. *Data Min Knowl Discov.* 1998;2:283–304. doi:10.1023/A:1009769707641
40. Package ‘clustMixType’ k-Prototypes Clustering for Mixed Variable-Type Data, 2021. Available from: <https://cran.r-project.org/web/packages/clustMixType/clustMixType.pdf>
41. Wang Y, Ding X, Tan Z, Ning C, Xing K, Yang T, *et al.* Genome-wide association study of piglet uniformity and farrowing interval. *Front Genet.* 2017;8:194. doi:10.3389/fgene.2017.00194
42. Jiang L, Zheng Z, Fang H, Yang J. A generalized linear mixed model association tool for biobank-scale data. *Nat Genet.* 2021;53:1616–21. doi:10.1038/s41588-021-00954-4

43. Wang K, Li M, Hakonarson H. ANNOVAR: functional annotation of genetic variants from high-throughput sequencing data. *Nucleic Acids Res.* 2010;38:e164  
doi:10.1093/nar/gkq603
44. Ng MCY, Graff M, Lu Y, Justice AE, Mudgal P, Liu C-T, *et al.* Discovery and fine-mapping of adiposity loci using high density imputation of genome-wide association studies in individuals of African ancestry: African Ancestry Anthropometry Genetics Consortium. *PLoS Genet.* 2017;13:e1006719. doi:10.1371/journal.pgen.1006719
45. Wojcik GL, Graff M, Nishimura KK, Tao R, Haessler J, Gignoux CR, *et al.* Genetic analyses of diverse populations improves discovery for complex traits. *Nature* 2019;570:514–8. doi:10.1038/s41586-019-1310-4
46. Monda KL, Chen GK, Taylor KC, Palmer C, Edwards TL, Lange LA, *et al.* A meta-analysis identifies new loci associated with body mass index in individuals of African ancestry. *Nat Genet.* 2013;45:690–6. doi:10.1038/ng.2608
47. Thorleifsson G, Walters GB, Gudbjartsson DF, Steinthorsdottir V, Sulem P, Helgadóttir A, *et al.* Genome-wide association yields new sequence variants at seven loci that associate with measures of obesity. *Nat Genet.* 2008;41:18–24.  
doi:10.1038/ng.274
48. Pei YF, Zhang L, Liu Y, Li J, Shen H, Liu Y-Z, *et al.* Meta-analysis of genome-wide association data identifies novel susceptibility loci for obesity. *Hum Mol Genet.* 2014;23:820–30. doi:10.1093/hmg/ddt464
49. Willer CJ, Speliotes EK, Loos RJF, Li S, Lindgren CM, Heid IM, *et al.* Six new loci associated with body mass index highlight a neuronal influence on body weight regulation. *Nat Genet.* 2008;41:25–34. doi:10.1038/ng.287

50. Zhu Z, Guo Y, Shi H, Liu C-L, Panganiban RA, Chung W, *et al.* Shared genetic and experimental links between obesity-related traits and asthma subtypes in UK Biobank. *J Allergy Clin Immunol.* 2020;145:537–49. doi:10.1016/j.jaci.2019.09.035
51. Tachmazidou I, Süveges D, Min JL, Ritchie GRS, Steinberg J, Walter K, *et al.* Whole-genome sequencing coupled to imputation discovers genetic signals for anthropometric traits. *Am J Hum Genet.* 2017;100:865–84. doi:10.1016/j.ajhg.2017.04.014
52. Sakaue S, Kanai M, Tanigawa Y, Karjalainen J, Kurki M, Koshihara S, *et al.* A cross-population atlas of genetic associations for 220 human phenotypes. *Nat Genet.* 2021;53:1415–24. doi:10.1038/s41588-021-00931-x.
53. Barton AR, Sherman MA, Mukamel RE, Loh PR. Whole-exome imputation within UK Biobank powers rare coding variant association and fine-mapping analyses. *Nat Genet.* 2021;53:1260–9. doi:10.1038/s41588-021-00892-1
54. Akbari P, Gilani A, Sosina O, Kosmicki JA, Khromian L, Fang Y-Y, *et al.* Sequencing of 640,000 exomes identifies GPR75 variants associated with protection from obesity. *Science* 2021;373:eabf8683. doi:10.1126/science.abf8683.
55. Shin J, Syme C, Wang D, Richer L, Pike GB, Gaudet D, *et al.* Novel genetic locus of visceral fat and systemic inflammation. *J Clin Endocrinol Metab.* 2019;104:3735–42. doi:10.1210/jc.2018-02656
56. Akenroye AT, Brunetti T, Romero K, Daya M, Kanchan K, Shankar G, *et al.* Genome-wide association study of asthma, total IgE, and lung function in a cohort of Peruvian children. *J Allergy Clin Immunol.* 2021;148:1493–504. doi:10.1016/j.jaci.2021.02.035.
57. Chen MH, Raffield LM, Mousas A, Sakaue S, Huffman JE, Moscati A, *et al.* Trans-ethnic and ancestry-specific blood-cell genetics in 746,667 individuals from 5 global populations. *Cell.* 2020;182:1198–213. doi:10.1016/j.cell.2020.06.045

58. Vuckovic D, Bao EL, Akbari P, Lareau CA, Mousas A, Jiang T, et al. The polygenic and monogenic basis of blood traits and diseases. *Cell*. 2020;182:1214–31.  
doi:10.1016/j.cell.2020.08.008
59. Sinnott-Armstrong N, Tanigawa Y, Amar D, Mars N, Benner C, Aguirre M, et al. Genetics of 35 blood and urine biomarkers in the UK Biobank. *Nat Genet*. 2021;53:185–94. doi:10.1038/s41588-020-00757-z
60. Mahajan A, Taliun D, Thurner M, Robertson NR, Torres JM, Rayner NW, et al. Fine-mapping type 2 diabetes loci to single-variant resolution using high-density imputation and islet-specific epigenome maps. *Nat Genet*. 2018;50:1505–13 doi:10.1038/s41588-018-0241-6
61. Claussnitzer M, Dankel SN, Kim K-H, Quon G, Meuleman W, Haugen C, et al. FTO obesity variant circuitry and adipocyte browning in humans. *N Engl J Med*. 2015;373:895–907. doi:10.1056/NEJMoa1502214
62. Balthasar N, Dalgaard LT, Lee CE, Yu J, Funahashi H, Williams T, et al. Divergence of melanocortin pathways in the control of food intake and energy expenditure. *Cell*. 2005;123:493–505. doi:10.1016/j.cell.2005.08.035
63. Krashes MJ, Lowell BB, Garfield AS. Melanocortin-4 receptor–regulated energy homeostasis. *Nat Neurosci*. 2016;19:206–19. doi:10.1038/nn.4202
64. Noble EE, Billington CJ, Kotz CM, Wang CF. The lighter side of BDNF. *Am J Physiol Regul Integr Comp Physiol*. 2011;300:R1053. doi:10.1152/ajpregu.00776.2010
65. Pandit M, Behl T, Sachdeva M, Arora S. Role of brain derived neurotropic factor in obesity. *Obes Med*. 2020;17:100189. Doi:10.1016/j.obmed.2020.100189
66. Ghafouri-Fard S, Khoshbakht T, Taheri M, Ghanbari M. A concise review on the role of BDNF-AS in human disorders. *Biomed Pharmacother*. 2021;142:112051.  
doi:10.1016/j.biopha.2021.112051

67. Shi R, Lu W, Tian Y, Wang B, Ave L. Intestinal SEC16B modulates obesity by controlling dietary lipid absorption. *bioRxiv*. 2021. doi:10.1101/2021.12.07.471468.
68. Hotta K, Nakamura M, Nakamura T, Matsuo T, Nakata Y, Kamohara S, *et al*. Association between obesity and polymorphisms in SEC16B, TMEM18, GNPDA2, BDNF, FAIM2 and MC4R in a Japanese population. *J Hum Genet*. 2009;54:727–31. doi:10.1038/jhg.2009.106.
69. Haakstad LAH, Stensrud T, Gjestvang C. Does self-perception equal the truth when judging own body weight and height? *Int J Environ Res Public Health*. 2021;18:8502. doi:10.3390/ijerph18168502.



Table 1. Characteristics of the clusters.

|                                                                          | 1                  | 2                 | 3                 | 4                 | 5                 |      |
|--------------------------------------------------------------------------|--------------------|-------------------|-------------------|-------------------|-------------------|------|
| Number of participants with obesity in each cluster                      | 628                | 3073              | 4111              | 2468              | 2787              |      |
| Cohort                                                                   |                    |                   |                   |                   |                   |      |
| TMM BirThree Cohort Study                                                | 69 (11.0)          | 311 (10.1)        | 1157 (28.1)       | 347 (14.1)        | 911 (32.7)        | High |
| TMM CommCohort StudyType-1                                               | 461 (73.4)         | 2185 (71.1)       | 2308 (56.1)       | 1671 (67.7)       | 1459 (52.4)       | High |
| TMM CommCohort StudyType-2                                               | 98 (15.6)          | 577 (18.8)        | 646 (15.7)        | 450 (18.2)        | 417 (15.0)        | High |
| Body mass index (kg/m <sup>2</sup> ), mean (SD)                          | 27.89 (2.86)       | 27.52 (2.86)      | 27.89 (3.01)      | 27.75 (3.40)      | 27.97 (3.15)      | Low  |
| Sex (Female), n (%)                                                      | 429 (68.3)         | 2182 (71.0)       | 2064 (50.2)       | 1441 (58.4)       | 1068 (38.3)       | Low  |
| Age, mean (SD)                                                           | 63.19 (10.49)      | 63.91 (8.82)      | 53.05 (14.97)     | 61.78 (11.26)     | 50.13 (14.43)     | Low  |
| Energy intake (kcal/day), mean (SD)                                      | 3698.48 (614.37)   | 1762.55 (297.63)  | 1365.83 (383.23)  | 2724.54 (520.18)  | 2249.39 (398.18)  | Low  |
| Protein intake (g/day), mean (SD)                                        | 165.21 (42.58)     | 64.05 (11.88)     | 42.76 (12.30)     | 107.01 (21.94)    | 78.60 (13.97)     | Low  |
| Fat intake (g/day), mean (SD)                                            | 148.20 (42.11)     | 54.36 (14.77)     | 36.24 (14.24)     | 96.63 (29.90)     | 72.43 (21.84)     | Low  |
| Carbohydrate intake (g/day), mean (SD)                                   | 405.20 (102.38)    | 238.40 (53.37)    | 185.68 (59.18)    | 326.16 (76.90)    | 273.02 (68.82)    | Low  |
| Sodium intake (mg/day), mean (SD)                                        | 10076.84 (3514.42) | 4152.44 (1175.43) | 2463.53 (960.69)  | 6591.02 (1819.89) | 4508.60 (1262.10) | Low  |
| Potassium intake (mg/day), mean (SD)                                     | 7160.45 (1605.83)  | 2800.74 (551.85)  | 1526.41 (486.92)  | 4439.55 (782.99)  | 2715.77 (544.54)  | Low  |
| Calcium intake (mg/day), mean (SD)                                       | 1706.40 (956.58)   | 563.50 (200.86)   | 308.26 (156.96)   | 987.82 (489.58)   | 592.21 (296.28)   | Low  |
| Magnesium intake (mg/day), mean (SD)                                     | 688.69 (159.46)    | 284.94 (50.70)    | 171.87 (49.64)    | 441.28 (71.28)    | 294.01 (52.86)    | Low  |
| Phosphorus intake (mg/day), mean (SD)                                    | 2688.34 (742.22)   | 1025.36 (191.87)  | 667.55 (195.26)   | 1716.71 (393.09)  | 1222.02 (245.29)  | Low  |
| Iron intake (mg/day), mean (SD)                                          | 20.44 (6.03)       | 8.73 (1.83)       | 5.16 (1.53)       | 13.11 (2.88)      | 8.65 (1.79)       | Low  |
| Zinc intake (mg/day), mean (SD)                                          | 17.98 (4.16)       | 7.55 (1.31)       | 5.42 (1.50)       | 12.02 (2.47)      | 9.34 (1.78)       | Low  |
| Copper intake (mg/day), mean (SD)                                        | 2.70 (0.85)        | 1.24 (0.24)       | 0.79 (0.22)       | 1.81 (0.38)       | 1.26 (0.24)       | Low  |
| Manganese intake (mg/day), mean (SD)                                     | 6.83 (2.79)        | 4.13 (1.66)       | 2.42 (1.01)       | 5.19 (1.96)       | 3.37 (1.09)       | Low  |
| Retinol intake (µg/day), mean (SD)                                       | 2120.19 (1639.68)  | 602.68 (332.58)   | 312.40 (229.58)   | 1105.44 (661.04)  | 666.65 (452.91)   | Low  |
| Vitamin D intake (mg/day), mean (SD)                                     | 23.75 (26.41)      | 7.07 (4.35)       | 3.78 (2.98)       | 13.43 (8.96)      | 8.59 (5.38)       | Low  |
| Vitamin K intake (µg/day), mean (SD)                                     | 944.42 (743.11)    | 313.91 (163.46)   | 154.52 (102.94)   | 486.57 (298.52)   | 271.11 (127.74)   | Low  |
| Vitamin B1 intake (mg/day), mean (SD)                                    | 2.24 (0.51)        | 0.92 (0.21)       | 0.57 (0.19)       | 1.50 (0.34)       | 1.03 (0.23)       | Low  |
| Vitamin B2 intake (mg/day), mean (SD)                                    | 3.86 (1.34)        | 1.40 (0.36)       | 0.78 (0.29)       | 2.30 (0.69)       | 1.46 (0.43)       | Low  |
| Niacin intake (mg/day), mean (SD)                                        | 40.43 (15.25)      | 17.13 (4.22)      | 11.57 (4.19)      | 28.18 (8.00)      | 21.27 (5.65)      | Low  |
| Vitamin B6 intake (mg/day), mean (SD)                                    | 3.40 (0.85)        | 1.37 (0.26)       | 0.83 (0.26)       | 2.21 (0.40)       | 1.50 (0.31)       | Low  |
| VitaminB12 intake (mg/day), mean (SD)                                    | 19.14 (12.10)      | 5.75 (2.88)       | 3.33 (2.13)       | 11.31 (5.82)      | 7.62 (3.67)       | Low  |
| Folic acid intake (µg/day), mean (SD)                                    | 1001.59 (347.25)   | 402.90 (107.44)   | 194.46 (75.65)    | 599.17 (155.75)   | 331.59 (88.21)    | Low  |
| Vitamin C intake (mg/day), mean (SD)                                     | 332.58 (178.51)    | 143.77 (58.10)    | 54.52 (32.39)     | 205.01 (93.32)    | 90.81 (39.33)     | Low  |
| Cholesterol intake (mg/day), mean (SD)                                   | 735.15 (554.89)    | 229.51 (106.63)   | 160.33 (93.09)    | 429.94 (270.69)   | 342.50 (194.53)   | Low  |
| Dietary fiber intake (g/day), mean (SD)                                  | 35.50 (15.50)      | 14.62 (4.11)      | 7.30 (2.98)       | 21.51 (6.67)      | 12.25 (3.80)      | Low  |
| Lycopene intake (µg/day), mean (SD)                                      | 6666.82 (10005.23) | 3094.68 (5244.45) | 1252.77 (2849.40) | 5061.35 (9101.55) | 2117.82 (3576.83) | Low  |
| α-carotene intake (µg/day), mean (SD)                                    | 1658.99 (2095.73)  | 589.70 (718.99)   | 268.40 (294.49)   | 864.46 (1002.82)  | 449.63 (413.07)   | Low  |
| β-carotene intake (µg/day), mean (SD)                                    | 9667.42 (8422.51)  | 3306.81 (2244.96) | 1416.89 (1084.96) | 5038.74 (3517.34) | 2466.99 (1469.77) | Low  |
| β-Cryptoxanthin intake (µg/day), mean (SD)                               | 2725.27 (3071.63)  | 1282.12 (1427.77) | 382.64 (568.93)   | 1760.34 (2027.22) | 592.89 (649.73)   | Low  |
| Frequency of leisure time physical activity, Slow walking, n (%)         |                    |                   |                   |                   |                   |      |
| No activity                                                              | 164 (26.1)         | 989 (32.2)        | 1521 (37.0)       | 724 (29.3)        | 991 (35.6)        | Low  |
| < Once per month                                                         | 52 (8.3)           | 231 (7.5)         | 473 (11.5)        | 207 (8.4)         | 302 (10.8)        | Low  |
| 1-3 times per month                                                      | 74 (11.8)          | 428 (13.9)        | 671 (16.3)        | 320 (13.0)        | 491 (17.6)        | Low  |
| 1-2 times per week                                                       | 99 (15.8)          | 484 (15.8)        | 513 (12.5)        | 349 (14.1)        | 375 (13.5)        | Low  |
| 3-4 times per week                                                       | 93 (14.8)          | 340 (11.1)        | 342 (8.3)         | 315 (12.8)        | 243 (8.7)         | Low  |
| Almost every day                                                         | 146 (23.2)         | 601 (19.6)        | 591 (14.4)        | 553 (22.4)        | 385 (13.8)        | Low  |
| Frequency of leisure time physical activity, Fast walking, n (%)         |                    |                   |                   |                   |                   |      |
| No activity                                                              | 329 (52.4)         | 1820 (59.2)       | 2794 (68.0)       | 1334 (54.1)       | 1790 (64.2)       | Low  |
| < Once per month                                                         | 68 (10.8)          | 206 (6.7)         | 374 (9.1)         | 204 (8.3)         | 276 (9.9)         | Low  |
| 1-3 times per month                                                      | 47 (7.5)           | 273 (8.9)         | 281 (6.8)         | 238 (9.6)         | 233 (8.4)         | Low  |
| 1-2 times per week                                                       | 63 (10.0)          | 260 (8.5)         | 241 (5.9)         | 254 (10.3)        | 191 (6.9)         | Low  |
| 3-4 times per week                                                       | 53 (8.4)           | 227 (7.4)         | 168 (4.1)         | 191 (7.7)         | 143 (5.1)         | Low  |
| Almost every day                                                         | 68 (10.8)          | 287 (9.3)         | 253 (6.2)         | 247 (10.0)        | 154 (5.5)         | Low  |
| Frequency of leisure time physical activity, Moderate exercise n (%)     |                    |                   |                   |                   |                   |      |
| No activity                                                              | 189 (30.1)         | 963 (31.3)        | 2145 (52.2)       | 744 (30.1)        | 1302 (46.7)       | Low  |
| < Once per month                                                         | 56 (8.9)           | 255 (8.3)         | 516 (12.6)        | 249 (10.1)        | 383 (13.7)        | Low  |
| 1-3 times per month                                                      | 77 (12.3)          | 499 (16.2)        | 642 (15.6)        | 403 (16.3)        | 491 (17.6)        | Low  |
| 1-2 times per week                                                       | 101 (16.1)         | 582 (18.9)        | 389 (9.5)         | 394 (16.0)        | 311 (11.2)        | Low  |
| 3-4 times per week                                                       | 105 (16.7)         | 433 (14.1)        | 252 (6.1)         | 378 (15.3)        | 185 (6.6)         | Low  |
| Almost every day                                                         | 100 (15.9)         | 341 (11.1)        | 167 (4.1)         | 300 (12.2)        | 115 (4.1)         | Low  |
| Frequency of leisure time physical activity, Strenuous exercise, n (%)   |                    |                   |                   |                   |                   |      |
| No activity                                                              | 515 (82.0)         | 2670 (86.9)       | 3515 (85.5)       | 1989 (80.6)       | 2262 (81.2)       | Low  |
| < Once per month                                                         | 34 (5.4)           | 74 (2.4)          | 175 (4.3)         | 119 (4.8)         | 158 (5.7)         | Low  |
| 1-3 times per month                                                      | 18 (2.9)           | 91 (3.0)          | 140 (3.4)         | 133 (5.4)         | 163 (5.8)         | Low  |
| 1-2 times per week                                                       | 31 (4.9)           | 148 (4.8)         | 170 (4.1)         | 123 (5.0)         | 127 (4.6)         | Low  |
| 3-4 times per week                                                       | 23 (3.7)           | 75 (2.4)          | 89 (2.2)          | 87 (3.5)          | 58 (2.1)          | Low  |
| Almost every day                                                         | 7 (1.1)            | 15 (0.5)          | 22 (0.5)          | 17 (0.7)          | 19 (0.7)          | Low  |
| Time typically spent in physical activity per day, Strenuous work, n (%) |                    |                   |                   |                   |                   |      |
| No time                                                                  | 152 (24.2)         | 1117 (36.3)       | 1537 (37.4)       | 707 (28.6)        | 817 (29.3)        | Low  |
| min < 30                                                                 | 133 (21.2)         | 655 (21.3)        | 991 (24.1)        | 502 (20.3)        | 696 (25.0)        | Low  |
| 30 ≤ min < 60                                                            | 86 (13.7)          | 407 (13.2)        | 498 (12.1)        | 347 (14.1)        | 399 (14.3)        | Low  |
| 1 ≤ h < 3                                                                | 115 (18.3)         | 477 (15.5)        | 529 (12.9)        | 438 (17.7)        | 422 (15.1)        | Low  |
| 3 ≤ h < 5                                                                | 78 (12.4)          | 233 (7.6)         | 284 (6.9)         | 242 (9.8)         | 217 (7.8)         | Low  |
| 5 ≤ h < 7                                                                | 39 (6.2)           | 135 (4.4)         | 161 (3.9)         | 151 (6.1)         | 136 (4.9)         | Low  |
| 7 ≤ h < 9                                                                | 20 (3.2)           | 40 (1.3)          | 92 (2.2)          | 55 (2.2)          | 77 (2.8)          | Low  |
| 9 ≤ h < 11                                                               | 2 (0.3)            | 2 (0.1)           | 14 (0.3)          | 16 (0.6)          | 20 (0.7)          | Low  |
| h ≥ 11                                                                   | 3 (0.5)            | 7 (0.2)           | 5 (0.1)           | 10 (0.4)          | 3 (0.1)           | Low  |
| Time typically spent in physical activity per day, walk, n (%)           |                    |                   |                   |                   |                   |      |
| No time                                                                  | 14 (2.2)           | 39 (1.3)          | 88 (2.1)          | 44 (1.8)          | 44 (1.6)          | Low  |
| min < 30                                                                 | 88 (14.0)          | 412 (13.4)        | 841 (20.5)        | 340 (13.8)        | 545 (19.6)        | Low  |

|                                                                    |              |              |              |              |              |
|--------------------------------------------------------------------|--------------|--------------|--------------|--------------|--------------|
| 30 ≤ min < 60                                                      | 173 (27.5)   | 753 (24.5)   | 1137 (27.7)  | 642 (26.0)   | 966 (34.7)   |
| 1 ≤ h < 3                                                          | 212 (33.8)   | 1331 (43.3)  | 1360 (33.1)  | 941 (38.1)   | 723 (25.9)   |
| 3 ≤ h < 5                                                          | 66 (10.5)    | 318 (10.3)   | 367 (8.9)    | 278 (11.3)   | 269 (9.7)    |
| 5 ≤ h < 7                                                          | 41 (6.5)     | 143 (4.7)    | 186 (4.5)    | 125 (5.1)    | 138 (5.0)    |
| 7 ≤ h < 9                                                          | 21 (3.3)     | 48 (1.6)     | 91 (2.2)     | 61 (2.5)     | 67 (2.4)     |
| 9 ≤ h < 11                                                         | 10 (1.6)     | 16 (0.5)     | 22 (0.5)     | 30 (1.2)     | 24 (0.9)     |
| h ≥ 11                                                             | 3 (0.5)      | 13 (0.4)     | 19 (0.5)     | 7 (0.3)      | 11 (0.4)     |
| Time typically spent in physical activity per day, Standing, n (%) |              |              |              |              |              |
| No time                                                            | 10 (1.6)     | 39 (1.3)     | 96 (2.3)     | 35 (1.4)     | 41 (1.5)     |
| min < 30                                                           | 49 (7.8)     | 215 (7.0)    | 439 (10.7)   | 191 (7.7)    | 336 (12.1)   |
| 30 ≤ min < 60                                                      | 79 (12.6)    | 459 (14.9)   | 643 (15.6)   | 335 (13.6)   | 465 (16.7)   |
| 1 ≤ h < 3                                                          | 222 (35.4)   | 1169 (38.0)  | 1398 (34.0)  | 902 (36.5)   | 842 (30.2)   |
| 3 ≤ h < 5                                                          | 142 (22.6)   | 647 (21.1)   | 748 (18.2)   | 506 (20.5)   | 499 (17.9)   |
| 5 ≤ h < 7                                                          | 75 (11.9)    | 326 (10.6)   | 450 (10.9)   | 300 (12.2)   | 314 (11.3)   |
| 7 ≤ h < 9                                                          | 35 (5.6)     | 148 (4.8)    | 233 (5.7)    | 135 (5.5)    | 187 (6.7)    |
| 9 ≤ h < 11                                                         | 8 (1.3)      | 51 (1.7)     | 73 (1.8)     | 45 (1.8)     | 64 (2.3)     |
| h ≥ 11                                                             | 8 (1.3)      | 19 (0.6)     | 31 (0.8)     | 19 (0.8)     | 39 (1.4)     |
| Time typically spent in physical activity per day, Sitting, n (%)  |              |              |              |              |              |
| No time                                                            | 10 (1.6)     | 34 (1.1)     | 48 (1.2)     | 29 (1.2)     | 31 (1.1)     |
| min < 30                                                           | 18 (2.9)     | 73 (2.4)     | 108 (2.6)    | 86 (3.5)     | 84 (3.0)     |
| 30 ≤ min < 60                                                      | 60 (9.6)     | 195 (6.3)    | 311 (7.6)    | 173 (7.0)    | 231 (8.3)    |
| 1 ≤ h < 3                                                          | 213 (33.9)   | 824 (26.8)   | 1070 (26.0)  | 682 (27.6)   | 761 (27.3)   |
| 3 ≤ h < 5                                                          | 190 (30.3)   | 1159 (37.7)  | 1410 (34.3)  | 871 (35.3)   | 824 (29.6)   |
| 5 ≤ h < 7                                                          | 87 (13.9)    | 495 (16.1)   | 659 (16.0)   | 391 (15.8)   | 459 (16.5)   |
| 7 ≤ h < 9                                                          | 30 (4.8)     | 180 (5.9)    | 284 (6.9)    | 144 (5.8)    | 214 (7.7)    |
| 9 ≤ h < 11                                                         | 11 (1.8)     | 60 (2.0)     | 139 (3.4)    | 51 (2.1)     | 99 (3.6)     |
| h ≥ 11                                                             | 9 (1.4)      | 53 (1.7)     | 82 (2.0)     | 41 (1.7)     | 84 (3.0)     |
| Sleep duration, n (%)                                              |              |              |              |              |              |
| < 5 h                                                              | 56 (8.9)     | 169 (5.5)    | 291 (7.1)    | 151 (6.1)    | 182 (6.5)    |
| 5 ≤ h < 6                                                          | 158 (25.2)   | 1096 (35.7)  | 1156 (28.1)  | 656 (26.6)   | 677 (24.3)   |
| 6 ≤ h < 7                                                          | 213 (33.9)   | 984 (32.0)   | 1646 (40.0)  | 995 (40.3)   | 1258 (45.1)  |
| 7 ≤ h < 8                                                          | 142 (22.6)   | 617 (20.1)   | 732 (17.8)   | 464 (18.8)   | 508 (18.2)   |
| 8 ≤ h < 9                                                          | 46 (7.3)     | 179 (5.8)    | 238 (5.8)    | 168 (6.8)    | 148 (5.3)    |
| h ≥ 9                                                              | 13 (2.1)     | 28 (0.9)     | 48 (1.2)     | 34 (1.4)     | 14 (0.5)     |
| Difference between weight at age 20 and current weight, mean (SD)  | 10.86 (9.75) | 10.48 (8.86) | 11.31 (9.03) | 11.28 (9.49) | 11.99 (9.49) |
| Not smoked more than 100 cigarettes since birth, n (%)             | 446 (71.0)   | 2379 (77.4)  | 1961 (47.7)  | 1559 (63.2)  | 959 (34.4)   |
| Alcohol drinking, n (%)                                            |              |              |              |              |              |
| > 1 drink per month                                                | 277 (44.1)   | 1115 (36.3)  | 2274 (55.3)  | 1313 (53.2)  | 1918 (68.8)  |
| Quit                                                               | 18 (2.9)     | 79 (2.6)     | 169 (4.1)    | 63 (2.6)     | 113 (4.1)    |
| Rarely                                                             | 301 (47.9)   | 1688 (54.9)  | 1440 (35.0)  | 935 (37.9)   | 614 (22.0)   |
| Unable to drink                                                    | 32 (5.1)     | 191 (6.2)    | 228 (5.5)    | 157 (6.4)    | 142 (5.1)    |
| Total score of K6, n (%)                                           | 4.74 (4.75)  | 3.81 (3.91)  | 4.61 (4.65)  | 4.36 (4.39)  | 5.12 (4.88)  |
| Birth weight, n (%)                                                |              |              |              |              |              |
| Unknown                                                            | 263 (41.9)   | 1559 (50.7)  | 1303 (31.7)  | 1021 (41.4)  | 493 (17.7)   |
| 1500 ≤ g < 2000                                                    | 17 (2.7)     | 60 (2.0)     | 68 (1.7)     | 58 (2.4)     | 46 (1.7)     |
| 2000 ≤ g < 2500                                                    | 57 (9.1)     | 223 (7.3)    | 300 (7.3)    | 186 (7.5)    | 188 (6.7)    |
| 2500 ≤ g < 3000                                                    | 159 (25.3)   | 727 (23.7)   | 1065 (25.9)  | 625 (25.3)   | 731 (26.2)   |
| 3000 ≤ g < 3500                                                    | 102 (16.2)   | 376 (12.2)   | 1057 (25.7)  | 451 (18.3)   | 1079 (38.7)  |
| 3500 ≤ g < 4000                                                    | 26 (4.1)     | 108 (3.5)    | 273 (6.6)    | 110 (4.5)    | 203 (7.3)    |
| g ≥ 4000                                                           | 4 (0.6)      | 20 (0.7)     | 45 (1.1)     | 17 (0.7)     | 47 (1.7)     |

The characteristics of obese participants in each cluster.

The variables are characterized by the mean and standard deviation for continuous variables and by number and percentage for categorical variables.

In the case of continuous variables, the cluster with the higher mean is colored red, and the cluster with the lower mean is colored blue.

In the case of categorical variables, the clusters with the higher percentages are colored red, and those with the lower percentages are colored blue.

## **Figure Legends**

### **Figure 1. Flow chart of exclusion criteria in this study.**

The participants data from each cohort were excluded based on the following criteria.

### **Figure 2. Manhattan plot of Step-1.**

A GWAS with BMI as a continuous variable was performed on 48,365 participants.

### **Figure 3. Manhattan plots of Step-2.**

We clustered 13,067 of the 48,356, individuals with  $BMI \geq 25 \text{kg/m}^2$  using the k-prototype.

Thereafter, participants with obesity in each of the 5 clusters and those with  $BMI < 25 \text{kg/m}^2$  were then combined and GWAS was performed according to the 5 clusters (cluster-based GWAS: cGWAS).

### **Supplementary Figure 1. Virtual Manhattan plots with different number of participants.**

### **Supplementary Figure 2. Plot of participants according to principal component 1 and 2 by principal component analysis.**

### **Supplementary Figure 3. Details of the cluster-based GWAS.**

### **Supplementary Figure 4. quantile-quantile plots and lambda values in main study.**

### **Supplementary Figure 5. Manhattan plots (a) and corresponding quantile-quantile plots (b) of Step-1 in sub-analysis.**

**Supplementary Figure 6. Manhattan plots (a) and corresponding quantile-quantile plots (b) of Step-2 in sub-analysis.**

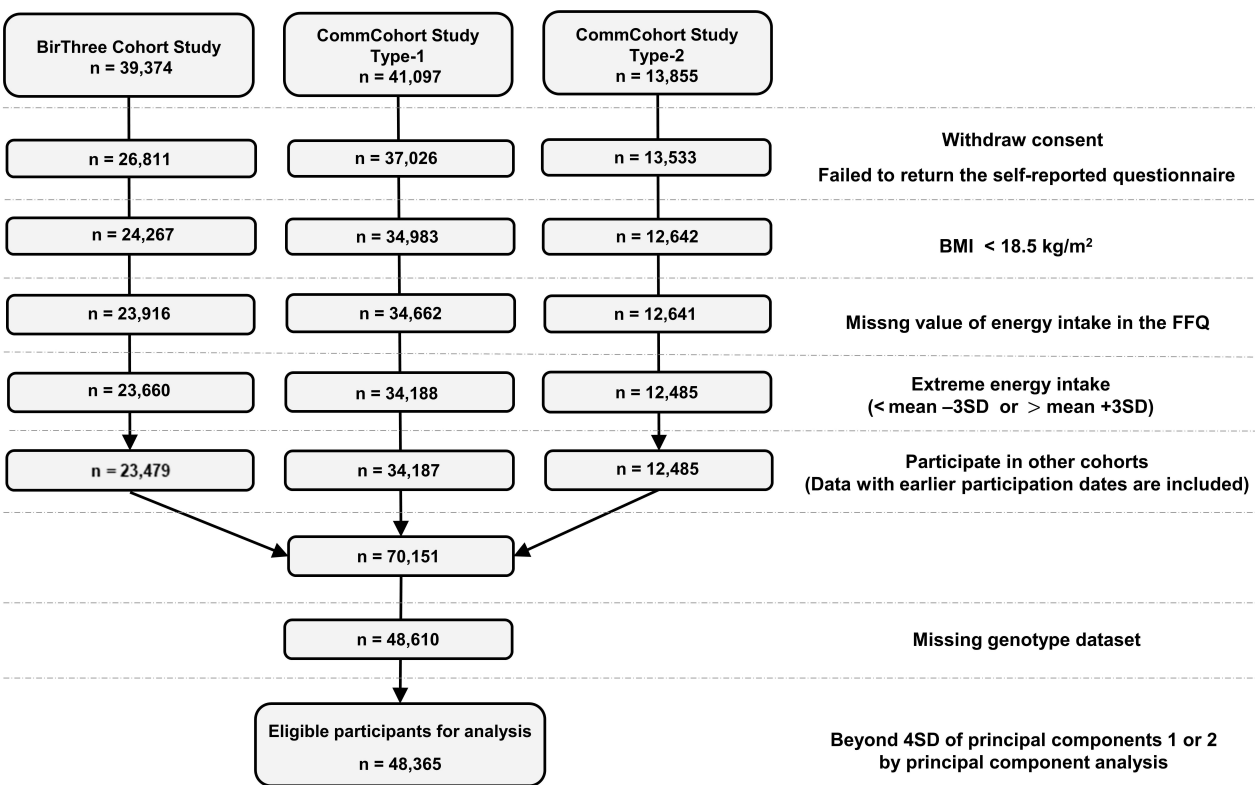

**Figure 1.** Flow chart of exclusion criteria in this study.

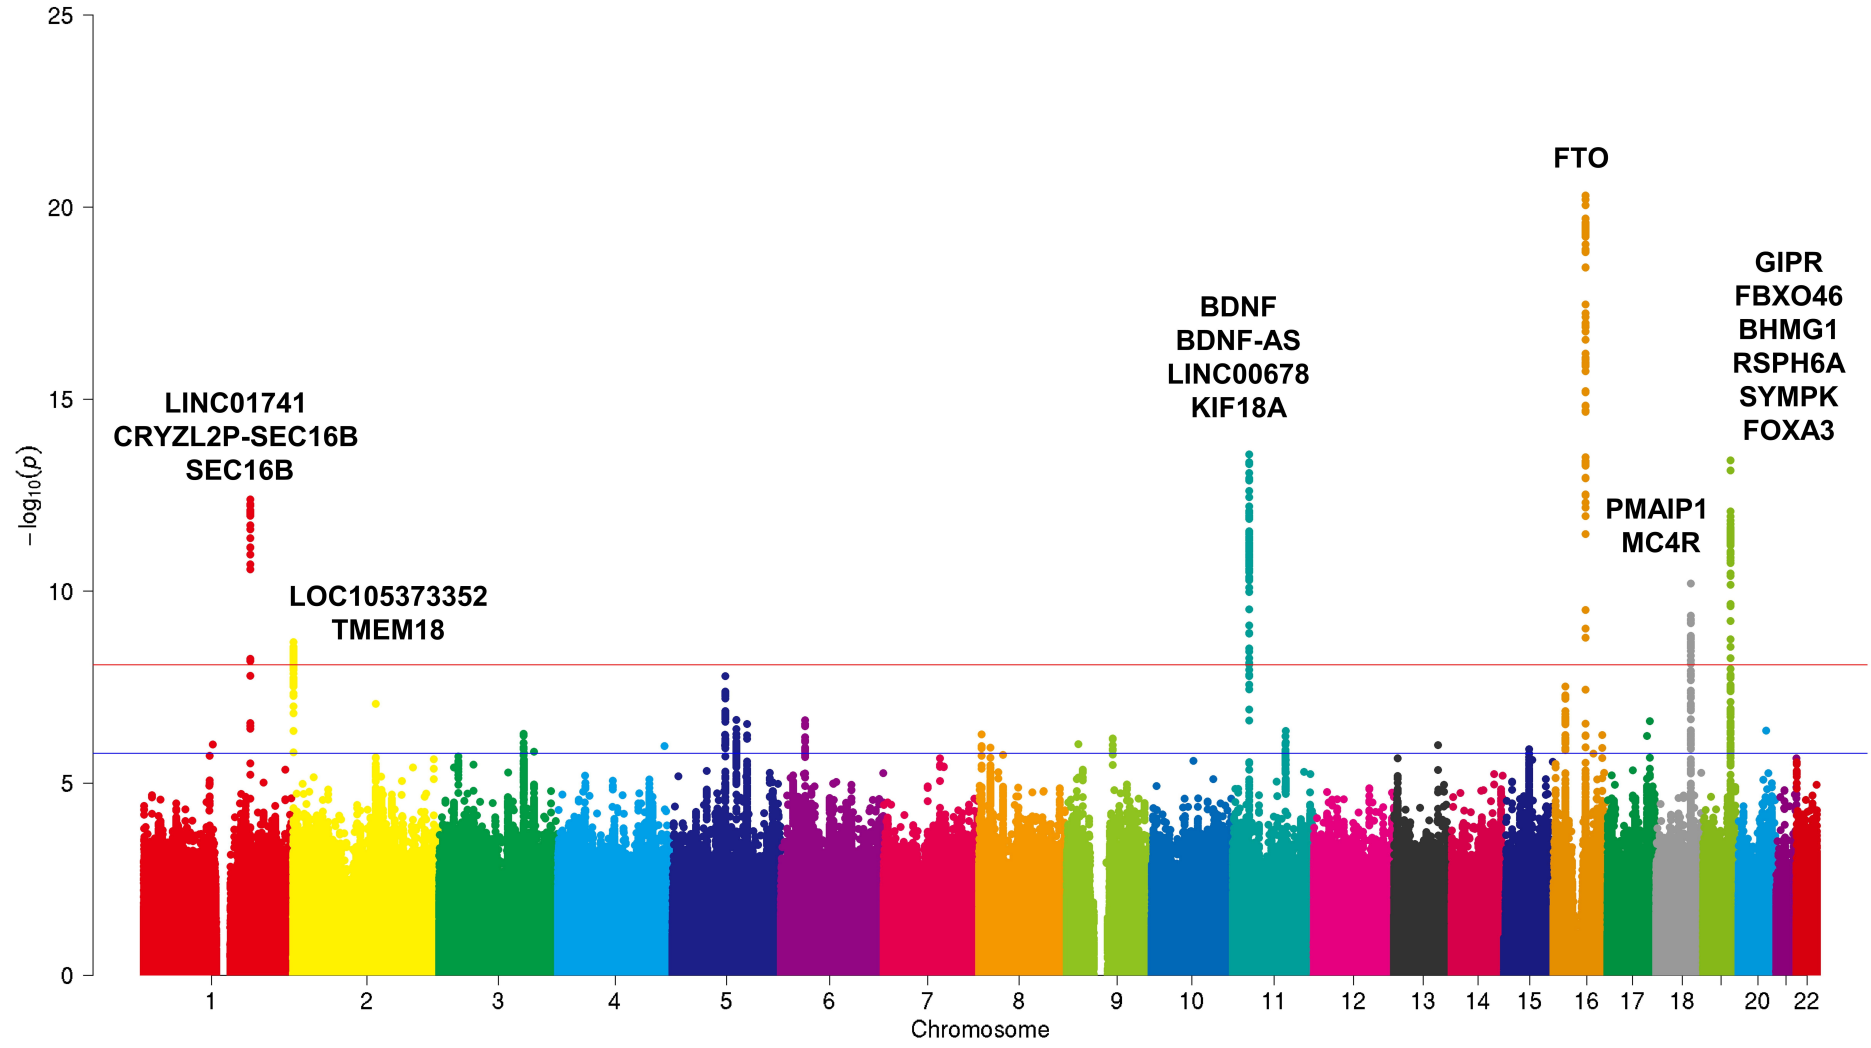

**Figure 2.** Manhattan plot of Step-1.

**Cluster 1**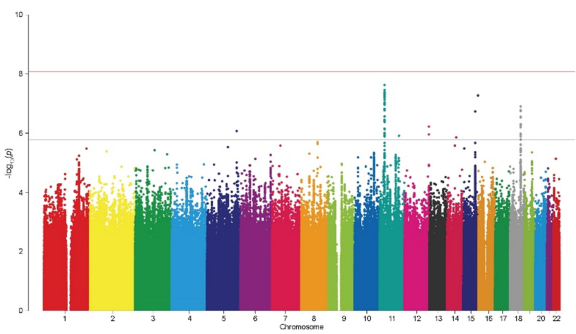**Cluster 2**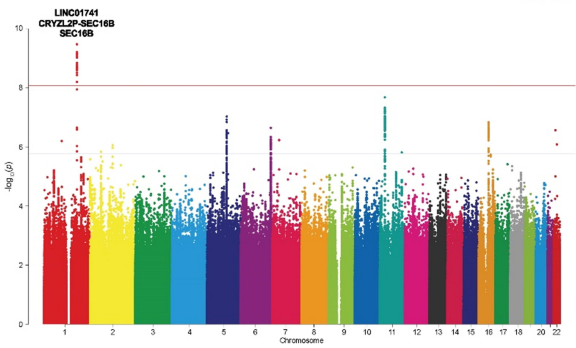**Cluster 3**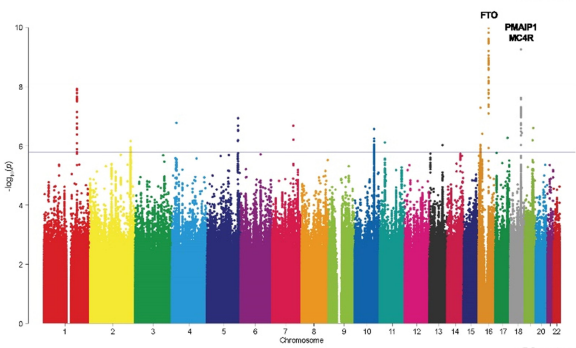**Cluster 4**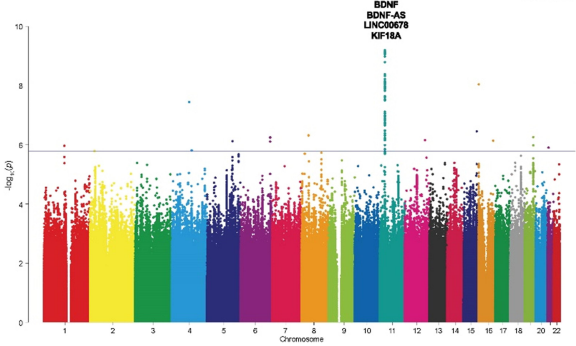**Cluster 5**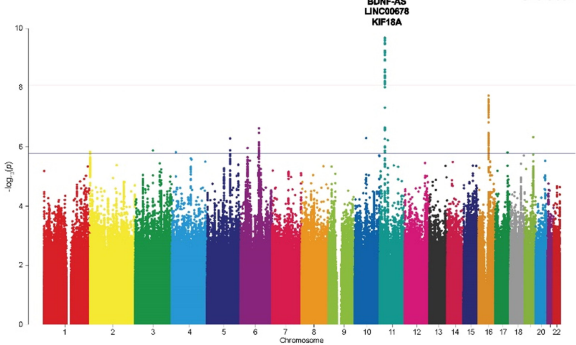**Figure 3. Manhattan plots of Step-2.**
